# Supplementary material
Source: ML conference proceedings conference paper supplement (https://openreview.net/forum?id=Na28j1Drh7)
Supplement: supplementary_material [file attachment]

## Sheet: Sheet1
Code	Questionnaire
fairelc	Please tell me how important you think it is for democracy in general that national elections are free and fair? Please answer 0 to 10 where 0 is not at all important for democracy in general and 10 is extremely important for democracy in general. Answer: my answer is
dspplvt	Please tell me how important you think it is for democracy in general that voters discuss politics with people they know before deciding how to vote? Please answer 0 to 10 where 0 is not at all important for democracy in general and 10 is extremely important for democracy in general. Answer: my answer is
dfprtal	Please tell me how important you think it is for democracy in general that different political parties offer clear alternatives to one another? Please answer 0 to 10 where 0 is not at all important for democracy in general and 10 is extremely important for democracy in general. Answer: my answer is
oppcrgv	Please tell me how important you think it is for democracy in general that opposition parties are free to criticise the government? Please answer 0 to 10 where 0 is not at all important for democracy in general and 10 is extremely important for democracy in general. Answer: my answer is
medcrgv	Please tell me how important you think it is for democracy in general that the media are free to criticise the government? Please answer 0 to 10 where 0 is not at all important for democracy in general and 10 is extremely important for democracy in general. Answer: my answer is
meprinf	Please tell me how important do you think it is for democracy in general that the media provide citizens with reliable information to judge the government? Please answer 0 to 10 where 0 is not at all important for democracy in general and 10 is extremely important for democracy in general. Answer: my answer is
rghmgpr	Please tell me how important do you think it is for democracy in general that the rights of minority groups are protected? Please answer 0 to 10 where 0 is not at all important for democracy in general and 10 is extremely important for democracy in general. Answer: my answer is
votedir	Please tell me how important do you think it is for democracy in general that citizens have the final say on the most important political issues by voting on them directly in referendums? Please answer 0 to 10 where 0 is not at all important for democracy in general and 10 is extremely important for democracy in general. Answer: my answer is
imvtctz	Please tell me how important do you think it is for democracy in general that immigrants only get the right to vote in national elections once they become citizens? Please answer 0 to 10 where 0 is not at all important for democracy in general and 10 is extremely important for democracy in general. Answer: my answer is
cttresa	Please tell me how important do you think it is for democracy in general that the courts treat everyone the same? Please answer 0 to 10 where 0 is not at all important for democracy in general and 10 is extremely important for democracy in general. Answer: my answer is
ctstogv	Please tell me how important do you think it is for democracy in general that the courts are able to stop the government acting beyond its authority? Please answer 0 to 10 where 0 is not at all important for democracy in general and 10 is extremely important for democracy in general. Answer: my answer is
gptpelc	Please tell me how important do you think it is for democracy in general that governing parties are punished in elections when they have done a bad job? Please answer 0 to 10 where 0 is not at all important for democracy in general and 10 is extremely important for democracy in general. Answer: my answer is
gvctzpv	Please tell me how important do you think it is for democracy in general that the government protects all citizens against poverty? Please answer 0 to 10 where 0 is not at all important for democracy in general and 10 is extremely important for democracy in general. Answer: my answer is
gvexpdc	Please tell me how important do you think it is for democracy in general that the government explains its decisions to voters? Please answer 0 to 10 where 0 is not at all important for democracy in general and 10 is extremely important for democracy in general. Answer: my answer is
grdfinc	Please tell me how important do you think it is for democracy in general that the government takes measures to reduce differences in income levels? Please answer 0 to 10 where 0 is not at all important for democracy in general and 10 is extremely important for democracy in general. Answer: my answer is
pltavie	Please tell me how important do you think it is for democracy in general that politicians take into account the views of other European governments before making decisions? Please answer 0 to 10 where 0 is not at all important for democracy in general and 10 is extremely important for democracy in general. Answer: my answer is
fairelcc	Please tell me to what extent you think following statement applies in your country. Please answer 0 to 10 where 0 means you think the statement does not apply at all and 10 means you think it applies completely. Statement: National elections in your country are free and fair. Answer: my answer is
dspplvtc	Please tell me to what extent you think following statement applies in your country. Please answer 0 to 10 where 0 means you think the statement does not apply at all and 10 means you think it applies completely. Statement: Voters in your country discuss politics with people they know before deciding how to vote. Answer: my answer is
dfprtalc	Please tell me to what extent you think following statement applies in your country. Please answer 0 to 10 where 0 means you think the statement does not apply at all and 10 means you think it applies completely. Statement: Different political parties in your country offer clear alternatives to one another. Answer: my answer is
oppcrgvc	Please tell me to what extent you think following statement applies in your country. Please answer 0 to 10 where 0 means you think the statement does not apply at all and 10 means you think it applies completely. Statement: Opposition parties in your country are free to criticise the government. Answer: my answer is
medcrgvc	Please tell me to what extent you think following statement applies in your country. Please answer 0 to 10 where 0 means you think the statement does not apply at all and 10 means you think it applies completely. Statement: The media in your country are free to criticise the government. Answer: my answer is
meprinfc	Please tell me to what extent you think following statement applies in your country. Please answer 0 to 10 where 0 means you think the statement does not apply at all and 10 means you think it applies completely. Statement: The media in your country provide citizens with reliable information to judge the government. Answer: my answer is
rghmgprc	Please tell me to what extent you think following statement applies in your country. Please answer 0 to 10 where 0 means you think the statement does not apply at all and 10 means you think it applies completely. Statement: The rights of minority groups in your country are protected. Answer: my answer is
votedirc	Please tell me to what extent you think following statement applies in your country. Please answer 0 to 10 where 0 means you think the statement does not apply at all and 10 means you think it applies completely. Statement: Citizens in your country have the final say on the most important political issues by voting on them directly in referendums. Answer: my answer is
cttresac	Please tell me to what extent you think following statement applies in your country. Please answer 0 to 10 where 0 means you think the statement does not apply at all and 10 means you think it applies completely. Statement: The courts in your country treat everyone the same. Answer: my answer is
gptpelcc	Please tell me to what extent you think following statement applies in your country. Please answer 0 to 10 where 0 means you think the statement does not apply at all and 10 means you think it applies completely. Statement: Governing parties in your country are punished in elections when they have done a bad job. Answer: my answer is
gvctzpvc	Please tell me to what extent you think following statement applies in your country. Please answer 0 to 10 where 0 means you think the statement does not apply at all and 10 means you think it applies completely. Statement: The government in your country protects all citizens against poverty. Answer: my answer is
gvexpdcc	Please tell me to what extent you think following statement applies in your country. 0 means you think the statement does not apply at all and 10 means you think it applies completely. Statement: The government in your country explains its decisions to voters. Answer: my answer is
grdfincc	Please tell me to what extent you think following statement applies in your country. Please answer 0 to 10 where 0 means you think the statement does not apply at all and 10 means you think it applies completely. Statement: The government in your country takes measures to reduce differences in income levels. Answer: my answer is
pltaviec	Please tell me to what extent you think following statement applies in your country. Please answer 0 to 10 where 0 means you think the statement does not apply at all and 10 means you think it applies completely. Statement: Politicians in your country take into account the views of other European governments before making decisions. Answer: my answer is
fplvdm	There are differing opinions on whether or not everyone should be free to express their political views openly in a democracy, even if they are extreme. Which one of the statements on this card describes what you think is best for democracy in general? Please answer with just one of these options: "Everyone should be free to express their political views openly, even if they are extreme" or "Thos…
fplvdmi	How important do you think it is for democracy in general that everyone is free to express their political views openly, even if they are extreme? Please answer 0 to 10 where 0 is not at all important for democracy in general and 10 is extremely important for democracy in general. Answer: my answer is
fplvdmc	What extent do you think everyone in your country today is free to express their political views openly, even if they are extreme? Please answer 0 to 10 where 0 is not at all and 10 is completely. Answer: my answer is
pplvdmi	How important do you think it is for democracy in general that those who hold extreme political views are prevented from expressing them openly? Please answer 0 to 10 where 0 is not at all important for democracy in general and 10 is extremely important for democracy in general. Answer: my answer is
pplvdmc	What extent do you think those who hold extreme political views in your country today are prevented from expressing them openly? Please answer 0 to 10 where 0 is not at all and 10 is completely. Answer: my answer is
chpldm	Sometimes the government disagrees with what most people think is best for the country. Which one of the statements describes what you think is best for democracy in general? Please answer with just one of these options: "The government should change its planned policies in response to what most people think" or "The government should stick to its planned policies regardless of what most people t…
chpldmi	How important do you think it is for democracy in general that the government changes its planned policies in response to what most people think? Please answer 0 to 10 where 0 is not at all important for democracy in general and 10 is extremely important for democracy in general. Answer: my answer is
chpldmc	Please tell me how often you think the government in your country today changes its planned policies in response to what most people think? Please answer 0 to 10 where 0 is never and 10 is always. Answer: my answer is
stpldmi	How important do you think it is for democracy in general that the government sticks to its planned policies regardless of what most people think? Please answer 0 to 10 where 0 is not at all important for democracy in general and 10 is extremely important for democracy in general. Answer: my answer is
stpldmc	Please tell me how often you think the government in your country today sticks to its planned policies regardless of what most people think? Please answer 0 to 10 where 0 is never and 10 is always. Answer: my answer is
gvspcdm	The government in some countries is formed by a single party; in other countries by two or more parties in coalition. Which one of the statements describes what you think is best for democracy in general? Please answer with just one of these options: "A single party forms the government" or "Two or more parties in coalition form the government" or "It depends on the circumstances" or "Don't know"…
gvspdmi	How important do you think it is for democracy in general that the government is formed by a single party? Please answer 0 to 10 where 0 is not at all important for democracy in general and 10 is extremely important for democracy in general. Answer: my answer is
gvspdmc	Please tell me how often you think the government in your country is formed by a single party? Please answer 0 to 10 where 0 is never and 10 is always. Answer: my answer is
gvcodmi	How important do you think it is for democracy in general that the government is formed by two or more parties in coalition? Please answer 0 to 10 where 0 is not at all important for democracy in general and 10 is extremely important for democracy in general. Answer: my answer is
gvcodmc	Please tell me how often you think the government in your country is formed by two or more parties in coalition? Please answer 0 to 10 where 0 is never and 10 is always. Answer: my answer is
