# Supplementary material
Source: ML conference proceedings conference paper supplement (https://openreview.net/forum?id=Na28j1Drh7)
Supplement: supplementary_material [file ESS_round_6_media_and_social_trust.xlsx]

## Sheet: Sheet1
Code	Questionnaire
tvtot	On an average weekday, how much time, in total, do you spend watching television? Please choose "No time at all" or "Less than 0.5 hour" or "0.5 to 1 hour" or "More than 1 hour, up to 1.5 hours" or "More than 1.5 hours, up to 2 hours" or "More than 2 hours, up to 2.5 hours" or "More than 2.5 hours, up to 3 hours" or "More than 3 hours" or "Don't know". Answer: If I have to answer with one of the …
tvpol	On an average weekday, how much of your time watching television is spent watching news or programmes about politics and current affairs? Please choose "No time at all" or "Less than 0.5 hour" or "0.5 to 1 hour" or "More than 1 hour, up to 1.5 hours" or "More than 1.5 hours, up to 2 hours" or "More than 2 hours, up to 2.5 hours" or "More than 2.5 hours, up to 3 hours" or "More than 3 hours" or "D…
ppltrst	Would you say that most people can be trusted, or that you can’t be too careful in dealing with people? Please tell me on a score of 0 to 10, where 0 means you can’t be too careful and 10 means that most people can be trusted. Answer: my answer is
pplfair	Do you think that most people would try to take advantage of you if they got the chance, or would they try to be fair? Please tell me on a score of 0 to 10, where 0 means most people try to take advantage of me and 10 means that most people try to be fair. Answer: my answer is
pplhlp	Would you say that most of the time people try to be helpful or that they are mostly looking out for themselves? Please tell me on a score of 0 to 10, where 0 means people mostly look out for themselves and 10 means that people mostly try to be helpful. Answer: my answer is
