# Supplementary material
Source: ML conference proceedings conference paper supplement (https://openreview.net/forum?id=Na28j1Drh7)
Supplement: supplementary_material [file ESS_round_6_personal_and_social_well-being.xlsx]

## Sheet: Sheet1
Code	Questionnaire
wkvlorg	In the past 12 months, how often did you get involved in work for voluntary or charitable organisations? Please answer with just one of these options: "At least once a week" or "At least once a month" or "At least once every three months" or "At least once every six months" or "Less often" or "Never" or "Don't know". Answer: If I have to answer with one of the options, my answer is
optftr	Please say how much you agree or disagree with each of the following statements. Statement: I'm always optimistic about my future. Please answer with just one of these options: "Agree strongly" or "Agree" or "Neither agree nor disagree" or "Disagree" or "Disagree strongly" or "Don't know". Answer: If I have to answer with one of the options, my answer is
pstvms	Please say how much you agree or disagree with each of the following statements. Statement: In general I feel very positive about myself. Please answer with just one of these options: "Agree strongly" or "Agree" or "Neither agree nor disagree" or "Disagree" or "Disagree strongly" or "Don't know". Answer: If I have to answer with one of the options, my answer is
flrms	Please say how much you agree or disagree with each of the following statements. Statement: At times I feel as if I am a failure. Please answer with just one of these options: "Agree strongly" or "Agree" or "Neither agree nor disagree" or "Disagree" or "Disagree strongly" or "Don't know". Answer: If I have to answer with one of the options, my answer is
fltdpr	I will now read out a list of the ways you might have felt or behaved during the past week. Please tell me how much of the time during the past week you felt depressed? Please answer with just one of these options: "None or almost none of the time" or "Some of the time" or "Most of the time" or "All or almost all of the time" or "Don't know". Answer: If I have to answer with one of the options, m…
flteeff	I will now read out a list of the ways you might have felt or behaved during the past week. Please tell me how much of the time during the past week you felt that everything you did was an effort? Please answer with just one of these options: "None or almost none of the time" or "Some of the time" or "Most of the time" or "All or almost all of the time" or "Don't know". Answer: If I have to answe…
slprl	I will now read out a list of the ways you might have felt or behaved during the past week. Please tell me how much of the time during the past week your sleep was restless? Please answer with just one of these options: "None or almost none of the time" or "Some of the time" or "Most of the time" or "All or almost all of the time" or "Don't know". Answer: If I have to answer with one of the optio…
wrhpp	I will now read out a list of the ways you might have felt or behaved during the past week. Please tell me how much of the time during the past week you were happy? Please answer with just one of these options: "None or almost none of the time" or "Some of the time" or "Most of the time" or "All or almost all of the time" or "Don't know". Answer: If I have to answer with one of the options, my an…
fltlnl	I will now read out a list of the ways you might have felt or behaved during the past week. Please tell me how much of the time during the past week you felt lonely? Please answer with just one of these options: "None or almost none of the time" or "Some of the time" or "Most of the time" or "All or almost all of the time" or "Don't know". Answer: If I have to answer with one of the options, my a…
enjlf	I will now read out a list of the ways you might have felt or behaved during the past week. Please tell me how much of the time during the past week you enjoyed life? Please answer with just one of these options: "None or almost none of the time" or "Some of the time" or "Most of the time" or "All or almost all of the time" or "Don't know". Answer: If I have to answer with one of the options, my …
fltsd	I will now read out a list of the ways you might have felt or behaved during the past week. Please tell me how much of the time during the past week you felt sad? Please answer with just one of these options: "None or almost none of the time" or "Some of the time" or "Most of the time" or "All or almost all of the time" or "Don't know". Answer: If I have to answer with one of the options, my answ…
cldgng	I will now read out a list of the ways you might have felt or behaved during the past week. Please tell me how much of the time during the past week you could not get going? Please answer with just one of these options: "None or almost none of the time" or "Some of the time" or "Most of the time" or "All or almost all of the time" or "Don't know". Answer: If I have to answer with one of the optio…
enrglot	I will now read out a list of the ways you might have felt or behaved during the past week. Please tell me how much of the time during the past week you had a lot of energy? Please answer with just one of these options: "None or almost none of the time" or "Some of the time" or "Most of the time" or "All or almost all of the time" or "Don't know". Answer: If I have to answer with one of the optio…
fltanx	I will now read out a list of the ways you might have felt or behaved during the past week. Please tell me how much of the time during the past week you felt anxious? Please answer with just one of these options: "None or almost none of the time" or "Some of the time" or "Most of the time" or "All or almost all of the time" or "Don't know". Answer: If I have to answer with one of the options, my …
fltpcfl	I will now read out a list of the ways you might have felt or behaved during the past week. Please tell me how much of the time during the past week you felt calm and peaceful? Please answer with just one of these options: "None or almost none of the time" or "Some of the time" or "Most of the time" or "All or almost all of the time" or "Don't know". Answer: If I have to answer with one of the op…
dclvlf	Please tell me to what extent you agree or disagree with each of the following statements. Statement: I feel I am free to decide for myself how to live my life. Please answer with just one of these options: "Agree strongly" or "Agree" or "Neither agree nor disagree" or "Disagree" or "Disagree strongly" or "Don't know". Answer: If I have to answer with one of the options, my answer is
lchshcp	Please tell me to what extent you agree or disagree with each of the following statements. Statement: In my daily life I get very little chance to show how capable I am. Please answer with just one of these options: "Agree strongly" or "Agree" or "Neither agree nor disagree" or "Disagree" or "Disagree strongly" or "Don't know". Answer: If I have to answer with one of the options, my answer is
accdng	Please tell me to what extent you agree or disagree with each of the following statements. Statement: Most days I feel a sense of accomplishment from what I do. Please answer with just one of these options: "Agree strongly" or "Agree" or "Neither agree nor disagree" or "Disagree" or "Disagree strongly" or "Don't know". Answer: If I have to answer with one of the options, my answer is
wrbknrm	Please tell me to what extent you agree or disagree with each of the following statements. Statement: When things go wrong in my life, it generally takes me a long time to get back to normal. Please answer with just one of these options: "Agree strongly" or "Agree" or "Neither agree nor disagree" or "Disagree" or "Disagree strongly" or "Don't know". Answer: If I have to answer with one of the opt…
lrnntlf	Please tell me to what extent you learn new things in your life? Please answer 0 to 6, where 0 means not at all and 6 means a great deal. Answer: my answer is
pplahlp	Please tell me to what extent you feel that people in your local area help one another? Please answer 0 to 6, where 0 means not at all and 6 means a great deal. Answer: my answer is
trtrsp	Please tell me to what extent you feel that people treat you with respect? Please answer 0 to 6, where 0 means not at all and 6 means a great deal. Answer: my answer is
dngval	Please tell me to what extent you agree or disagree with each of the following statements. Statement: I generally feel that what I do in my life is valuable and worthwhile. Please answer with one of these options: "Agree strongly" or "Agree" or "Neither agree nor disagree" or "Disagree" or "Disagree strongly" or "Don't know". Answer: If I have to answer with one of the options, my answer is
nhpftr	Please tell me to what extent you agree or disagree with each of the following statements. Statement: The way things are now, I find it hard to be hopeful about the future of the world. Please answer with just one of these options: "Agree strongly" or "Agree" or "Neither agree nor disagree" or "Disagree" or "Disagree strongly" or "Don't know". Answer: If I have to answer with one of the options, …
lotsgot	Please tell me to what extent you agree or disagree with each of the following statements. Statement: There are lots of things I feel I am good at. Please answer with just one of these options: "Agree strongly" or "Agree" or "Neither agree nor disagree" or "Disagree" or "Disagree strongly" or "Don't know". Answer: If I have to answer with one of the options, my answer is
lfwrs	Please tell me to what extent you agree or disagree with each of the following statements. Statement: For most people in your country life is getting worse rather than better. Please answer with just one of these options: "Agree strongly" or "Agree" or "Neither agree nor disagree" or "Disagree" or "Disagree strongly" or "Don't know". Answer: If I have to answer with one of the options, my answer …
flclpla	Please tell me to what extent you agree or disagree with each of the following statements. Statement: I feel close to the people in my local area. Please answer with just one of these options: "Agree strongly" or "Agree" or "Neither agree nor disagree" or "Disagree" or "Disagree strongly" or "Don't know". Answer: If I have to answer with one of the options, my answer is
tmdotwa	To what extent do you make time to do the things you really want to do? Please answer 0 to 10 where 0 is not at all and 10 is completely. Answer: my answer is
flapppl	To what extent do you feel appreciated by the people you are close to? Please answer 0 to 10 where 0 is not at all and 10 is completely. Answer: my answer is
deaimpp	How difficult or easy do you find it to deal with important problems that come up in your life? Please answer 0 to 10 where 0 is extremely difficult and 10 is extremely easy. Answer: my answer is
tmimdng	How much of the time would you generally say you are interested in what you are doing? Please answer 0 to 10 where 0 is none of the time and 10 is all of the time. Answer: my answer is
tmabdng	How much of the time would you generally say you are absorbed in what you are doing? Please answer 0 to 10 where 0 is none of the time and 10 is all of the time. Answer: my answer is
tmendng	How much of the time would you generally say you are enthusiastic about what you are doing? Please answer 0 to 10 where 0 is none of the time and 10 is all of the time. Answer: my answer is
tnapsur	On a typical day, how often do you take notice of and appreciate your surroundings? Please answer 0 to 10 where 0 is never and 10 is always. Answer: my answer is
sedirlf	To what extent do you feel that you have a sense of direction in your life? Please answer 0 to 10 where 0 is not at all and 10 is completely. Answer: my answer is
rehlppl	To what extent do you receive help and support from people you are close to when you need it? Please answer 0 to 10 where 0 is not at all and 10 is completely. Answer: my answer is
prhlppl	To what extent do you provide help and support to people you are close to when they need it? Please answer 0 to 10 where 0 is not at all and 10 is completely. Answer: my answer is
plinsoc	There are people who tend to be towards the top of our society and people who tend to be towards the bottom. Where would you place yourself on this scale nowadays? Please answer 0 to 10 where 0 is bottom of our society and 10 is top of our society. Answer: my answer is
physact	Please tell me on how many of the last 7 days you were physically active continuously for 20 minutes or longer? Please answer with just one of these options: "No days" or "One day" or "Two days" or "Three days" or "Four days" or "Five days" or "Six days" or "Seven days" or "Don't know". Answer: If I have to answer with one of the options, my answer is
