# Supplementary material
Source: ML conference proceedings conference paper supplement (https://openreview.net/forum?id=Na28j1Drh7)
Supplement: supplementary_material [file ESS_round_6_politics.xlsx]

## Sheet: Sheet1
Code	Questionnaire
polintr	How interested are you in politics? Please answer with just one of these options: "Very interested" or "Quite interested" or "Hardly interested" or "Not at all interested" or "Don't know". Answer: If I have to answer with one of the options, my answer is
trstprl	How much do you personally trust country's parliament? Please tell me on a score of 0 to 10 where 0 means you do not trust an institution at all, and 10 means you have complete trust. Answer: my answer is
trstlgl	How much do you personally trust the legal system? Please tell me on a score of 0 to 10 where 0 means you do not trust an institution at all, and 10 means you have complete trust. Answer: my answer is
trstplc	How much do you personally trust the police? Please tell me on a score of 0 to 10 where 0 means you do not trust an institution at all, and 10 means you have complete trust. Answer: my answer is
trstplt	How much do you personally trust politicians? Please tell me on a score of 0 to 10 where 0 means you do not trust an institution at all, and 10 means you have complete trust. Answer: my answer is
trstprt	How much do you personally trust political parties? Please tell me on a score of 0 to 10 where 0 means you do not trust an institution at all, and 10 means you have complete trust. Answer: my answer is
trstep	How much do you personally trust the European Parliament? Please tell me on a score of 0 to 10 where 0 means you do not trust an institution at all, and 10 means you have complete trust. Answer: my answer is
trstun	How much do you personally trust the United Nations? Please tell me on a score of 0 to 10 where 0 means you do not trust an institution at all, and 10 means you have complete trust. Answer: my answer is
vote	Did you vote the last national election? Please answer with just one of these options: "Yes" or "No" or "Not eligible to vote" or "Don't know". Answer: If I have to answer with one of the options, my answer is
contplt	During the last 12 months, have you contacted a politician, government or local government official? Please answer with just one of these options: "Yes" or "No" or "Don't know". Answer: If I have to answer with one of the options, my answer is
wrkprty	During the last 12 months, have you worked in a political party or action group? Please answer with just one of these options: "Yes" or "No" or "Don't know". Answer: If I have to answer with one of the options, my answer is
wrkorg	During the last 12 months, have you worked in another organisation or association? Please answer with just one of these options: "Yes" or "No" or "Don't know". Answer: If I have to answer with one of the options, my answer is
badge	During the last 12 months, have you worn or displayed a campaign badge/sticker? Please answer with just one of these options: "Yes" or "No" or "Don't know". Answer: If I have to answer with one of the options, my answer is
sgnptit	During the last 12 months, have you signed a petition? Please answer with just one of these options: "Yes" or "No" or "Don't know". Answer: If I have to answer with one of the options, my answer is
pbldmn	During the last 12 months, have you taken part in a lawful public demonstration? Please answer with just one of these options: "Yes" or "No" or "Don't know". Answer: If I have to answer with one of the options, my answer is
bctprd	During the last 12 months, have you boycotted certain products? Please answer with just one of these options: "Yes" or "No" or "Don't know". Answer: If I have to answer with one of the options, my answer is
implvdm	How important is it for you to live in a country that is governed democratically? Please tell me on a score of 0 to 10 where 0 is not at all important and 10 is extremely important. Answer: my answer is
dmcntov	How democratic do you think your country is overall? Please tell me on a score of 0 to 10 where 0 is not at all democratic and 10 is completely democratic. Answer: my answer is
lrscale	In politics people sometimes talk of “left” and “right”. Where would you place yourself on this scale, where 0 means the left and 10 means the right? Answer: my answer is
stflife	All things considered, how satisfied are you with your life as a whole nowadays? Please answer 0 to 10, where 0 means extremely dissatisfied and 10 means extremely satisfied. Answer: my answer is
stfeco	On the whole how satisfied are you with the present state of the economy in your country? Please answer 0 to 10, where 0 means extremely dissatisfied and 10 means extremely satisfied. Answer: my answer is
stfgov	Thinking about the your country government, how satisfied are you with the way it is doing its job? Please answer 0 to 10, where 0 means extremely dissatisfied and 10 means extremely satisfied. Answer: my answer is
stfdem	How satisfied are you with the way democracy works in your country? Please answer 0 to 10, where 0 means extremely dissatisfied and 10 means extremely satisfied. Answer: my answer is
stfedu	What you think overall about the state of education in your country nowadays? Please answer 0 to 10, where 0 means extremely bad and 10 means extremely good. Answer: my answer is
stfhlth	What you think overall about the state of health services in your country nowadays? Please answer 0 to 10, where 0 means extremely bad and 10 means extremely good. Answer: my answer is
gincdif	Please say to what extent you agree or disagree with each of the following statements. Statement: The government should take measures to reduce differences in income levels. Please answer with just one of these options: "Agree strongly" or "Agree" or "Neither agree nor disagree" or "Disagree" or "Disagree strongly" or "Don't know". Answer: If I have to answer with one of the options, my answer is
freehms	Please say to what extent you agree or disagree with each of the following statements. Statement: Gays and lesbians free to live life as they wish. Please answer with just one of these options: "Agree strongly" or "Agree" or "Neither agree nor disagree" or "Disagree" or "Disagree strongly" or "Don't know". Answer: If I have to answer with one of the options, my answer is
euftf	Thinking about the European Union, some say European unification should go further. Others say it has already gone too far. Please tell me on a score of 0 to 10 where 0 is unification has already gone too far and 10 is unification should go further. Answer: my answer is
imsmetn	What extent do you think your country should allow people of the same race or ethnic group as most your country’s people to come and live here? Please answer with just one of these options: "Allow many to come and live here" or "Allow some" or "Allow a few" or "Allow none" or "Don't know". Answer: If I have to answer with one of the options, my answer is
imdfetn	What extent do you think your country should allow people of a different race or ethnic group from most your country people? Please answer with just one of these options: "Allow many to come and live here" or "Allow some" or "Allow a few" or "Allow none" or "Don't know". Answer: If I have to answer with one of the options, my answer is
impcntr	What extent do you think your country should allow people from the poorer countries outside Europe? Please answer with just one of these options: "Allow many to come and live here" or "Allow some" or "Allow a few" or "Allow none" or "Don't know". Answer: If I have to answer with one of the options, my answer is
imbgeco	Would you say it is generally bad or good for your country’s economy that people come to live here from other countries? Please answer 0 to 10, where 0 means bad for the economy and 10 means good for the economy. Answer: If I have to answer with one of the options, my answer is
imueclt	Would you say that your country’s cultural life is generally undermined or enriched by people coming to live here from other countries? Please answer 0 to 10, where 0 means cultural life undermined and 10 means cultural life enriched. Answer: my answer is
imwbcnt	Is your country made a worse or a better place to live by people coming to live here from other countries? Please answer 0 to 10, where 0 means worse place to live and 10 means better place to live. Answer: my answer is
