# Supplementary material
Source: ML conference proceedings conference paper supplement (https://openreview.net/forum?id=Na28j1Drh7)
Supplement: supplementary_material [file ESS_round_6_subjective_well-being.xlsx]

## Sheet: Sheet1
Code	Questionnaire
happy	Taking all things together, how happy would you say you are? Please answer 0 to 10, where 0 means extremely unhappy and 10 means extremely happy. Answer: my answer is
sclmeet	How often do you meet socially with friends, relatives or work colleagues? Please answer with just one of these options: "Never" or "Less than once a month" or "Once a month" or "Sevelral times a month" or "Once a week" or "Several times a week" or "Every day" or "Don't know". Answer: If I have to answer with one of the options, my answer is
inprdsc	How many people, if any, are there with whom you can discuss intimate and personal matters? Please answer with just one of these options: "None" or "1" or "2" or "3" or "4~6" or "7~9" or "10 or more" or "Don't know". Answer: If I have to answer with one of the options, my answer is
sclact	Compared to other people of your age, how often would you say you take part in social activities? Please answer with just one of these options: "Much less than most" or "Less than most" or "About the same" or "More than most" or "Much more than most" or "Don't know". Answer: If I have to answer with one of the options, my answer is
crmvct	Have you or a member of your household been the victim of a burglary or assault in the last 5 years? Please answer with just one of these options: "Yes" or "No" or "Don't know". Answer: If I have to answer with one of the options, my answer is
aesfdrk	How safe do you – or would you - feel walking alone in this area after dark? Please answer with just one of these options: "very safe" or "safe" or "unsafe" or "very unsafe" or "Don't know". Answer: If I have to answer with one of the options, my answer is
health	How is your health in general? Please answer with just one of these options: "very good" or "good" or "fair" or "bad" or "very bad" or "don't know". Answer: If I have to answer with one of the options, my answer is
hlthhmp	Are you hampered in your daily activities in any way by any longstanding illness, or disability, infirmity or mental health problem? Please answer with just one of these options: "Yes a lot" or "Yes to some extent" or "No" or "Don't know". Answer: If I have to answer with one of the options, my answer is
rlgblg	Do you consider yourself as belonging to any particular religion or denomination? Please answer with just one of these options: "Yes" or "No" or "Don't know". Answer: If I have to answer with one of the options, my answer is
rlgdgr	Regardless of whether you belong to a particular religion, how religious would you say you are? Please tell me on a score of 0 to 10. 0 is not at all religious and 10 is very religious. Answer: If I have to answer with one of the options, my answer is
rlgatnd	Apart from special occasions such as weddings and funerals, about how often do you attend religious services nowadays? Please answer with just one of these options: "Everyday" or "More than once a week" or "Once a week" or "At least once a month" or "Only on special holy days" or "Less often" or "Never" or "Don't know". Answer: If I have to answer with one of the options, my answer is
pray	Apart from when you are at religious services, how often, if at all, do you pray? Please answer with just one of these options: "Everyday" or "More than once a week" or "Once a week" or "At least once a month" or "Only on special holy days" or "Less often" or "Never" or "Don't know". Answer: If I have to answer with one of the options, my answer is
dscrgrp	Would you describe yourself as being a member of a group that is discriminated against in this country? Please answer with just one of these options: "Yes" or "No" or "Don't know". Answer: If I have to answer with one of the options, my answer is
dscrrce	Is your group discriminated against by colour or race? Please answer "Yes" or "No". Answer: If I have to answer with one of the options, my answer is
dscrntn	Is your group discriminated against by nationality? Please answer "Yes" or "No". Answer: If I have to answer with one of the options, my answer is
dscrrlg	Is your group discriminated against by religion? Please answer "Yes" or "No". Answer: If I have to answer with one of the options, my answer is
dscrlng	Is your group discriminated against by language? Please answer "Yes" or "No". Answer: If I have to answer with one of the options, my answer is
dscretn	Is your group discriminated against by ethnic group? Please answer "Yes" or "No". Answer: If I have to answer with one of the options, my answer is
dscrage	Is your group discriminated against by age? Please answer "Yes" or "No". Answer: If I have to answer with one of the options, my answer is
dscrgnd	Is your group discriminated against by gender? Please answer "Yes" or "No". Answer: If I have to answer with one of the options, my answer is
dscrsex	Is your group discriminated against by sexuality? Please answer "Yes" or "No". Answer: If I have to answer with one of the options, my answer is
dscrdsb	Is your group discriminated against by disability? Please answer "Yes" or "No". Answer: If I have to answer with one of the options, my answer is
dscroth	Is your group discriminated against by other grounds? Please answer "Yes" or "No". Answer: If I have to answer with one of the options, my answer is
ctzcntr	Are you a citizen of your country? Please answer "Yes" or "No". Answer: If I have to answer with one of the options, my answer is
brncntr	Were you born in your country? Please answer with just one of these options: "Yes" or "No" or "Don't know". Answer: If I have to answer with one of the options, my answer is
blgetmg	Do you belong to a minority ethnic group in your country? Please answer with just one of these options: "Yes" or "No" or "Don't know". Answer: If I have to answer with one of the options, my answer is
facntr	Was your father born in your country? Please answer with just one of these options: "Yes" or "No" or "Don't know". Answer: If I have to answer with one of the options, my answer is
mocntr	Was your mother born in your country? Please answer with just one of these options: "Yes" or "No" or "Don't know". Answer: If I have to answer with one of the options, my answer is
